# Supplementary material
Source: Springer Nature journal article supplement (https://www.springermedizin.de/resource/supplementary/13075_2013_4271_MOESM5_ESM.pdf/9696308)

skin manifestation

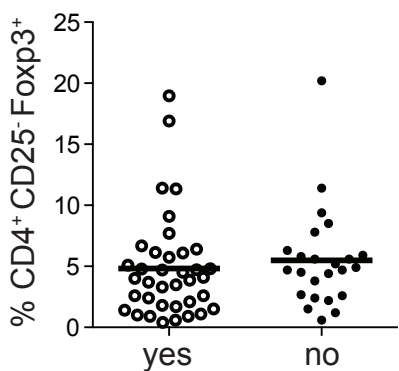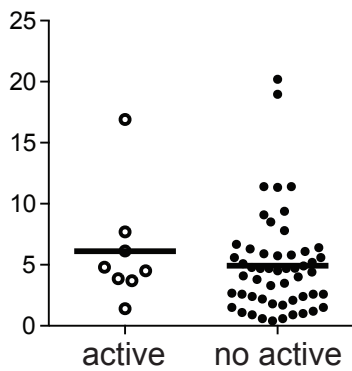

hematologic manifestation

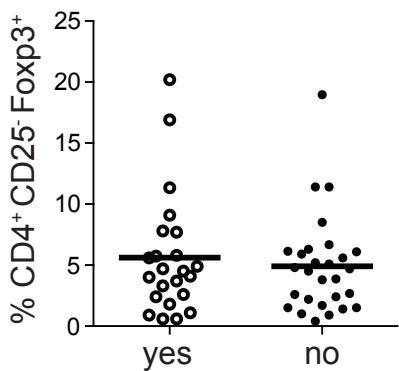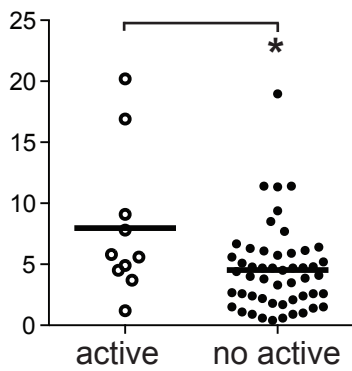

joint manifestation

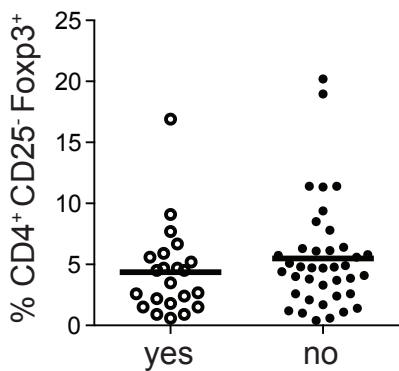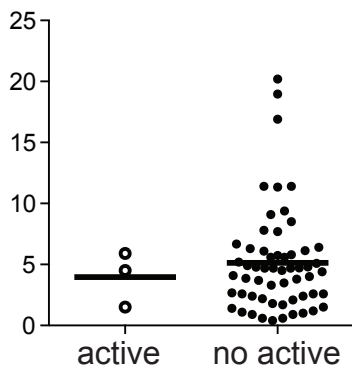

serositis manifestation

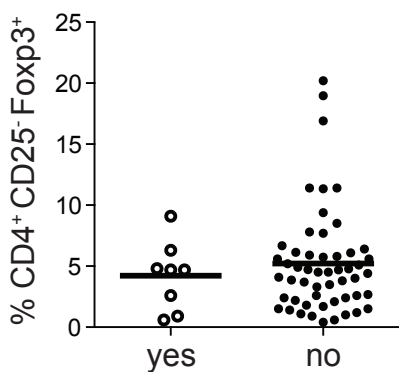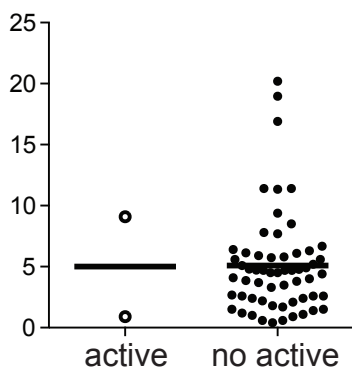

renal manifestation

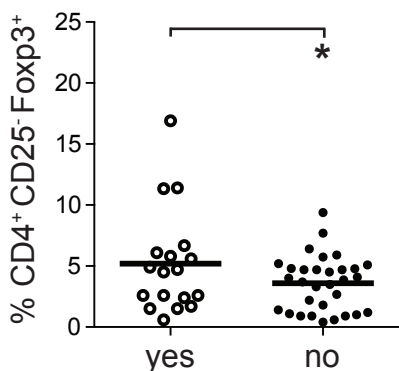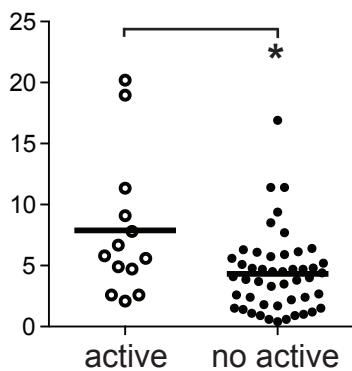

Supplement: MOESM5 [file 9696308]
